# Supplementary material for: High dielectric and breakdown properties obtained in a PVDF based nanocomposite with sandwich structure at high temperature via all-2D design
Source: Royal Society of Chemistry journal article supplement (doi:10.1039/c9tc01378d), 2019-01-01
Supplement: c9tc01378d1.pdf [file c9tc01378d1.pdf]

## Supporting Information for Publication

### High dielectric and breakdown properties of PVDF nanocomposite with sandwich construction at elevated temperature via all-2D design

Yefeng Feng, Qin Wu, Qihuang Deng\*, Cheng Peng\*, Jianbing Hu, Zhichao Xu

Fig. S1 showed the particle-size distribution results of BN and MXene fillers used in this work. For two kinds of fillers, over 85% of particles possessed the single particle size (100 nm for BN and 1000 nm for MXene).

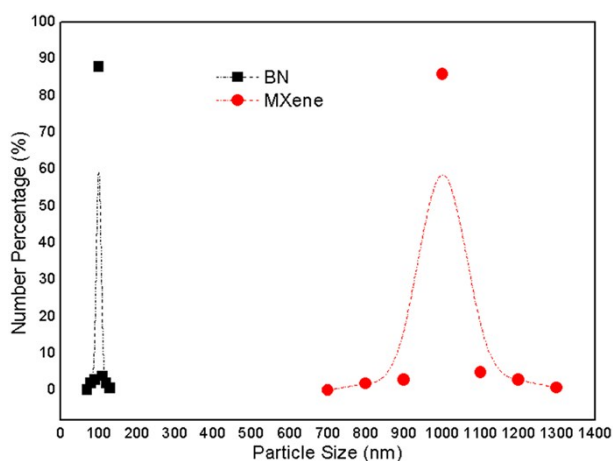

Figure S1. Particle size distribution results of BN and MXene.
